# Supplementary material for: Blood Flow Restriction Training in Nonspecific Shoulder Pain: Study Protocol of a Crossover Randomised Controlled Trial
Source: MDPI journal article supplement (doi:10.3390/sports11100197), 2023-10-09
Supplement: s1 [file s1]

**Supplementary File S1:** Muscle loading protocol of the shoulder girdle

1. Low row

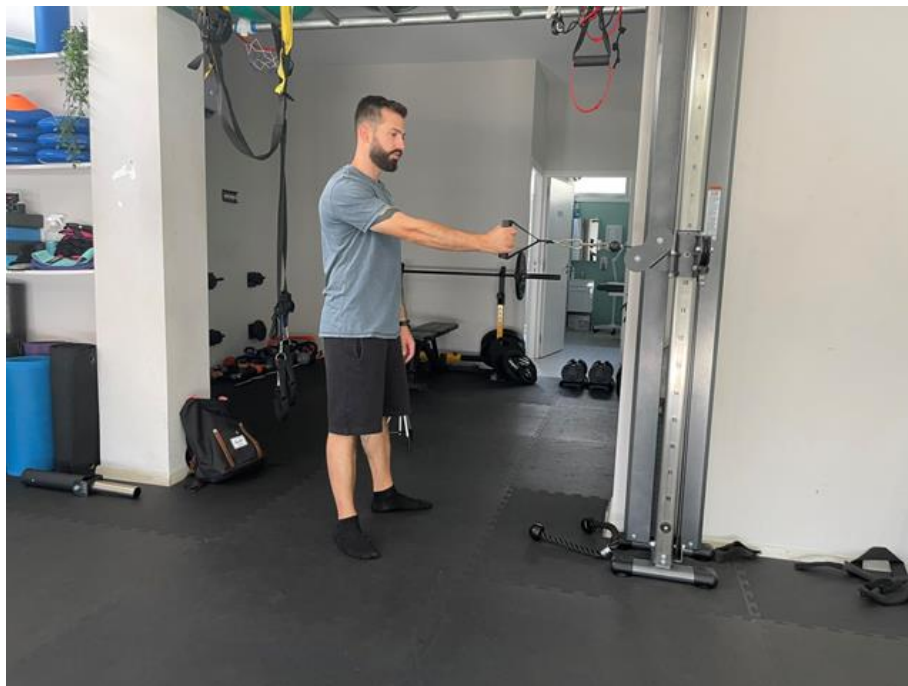

Start position

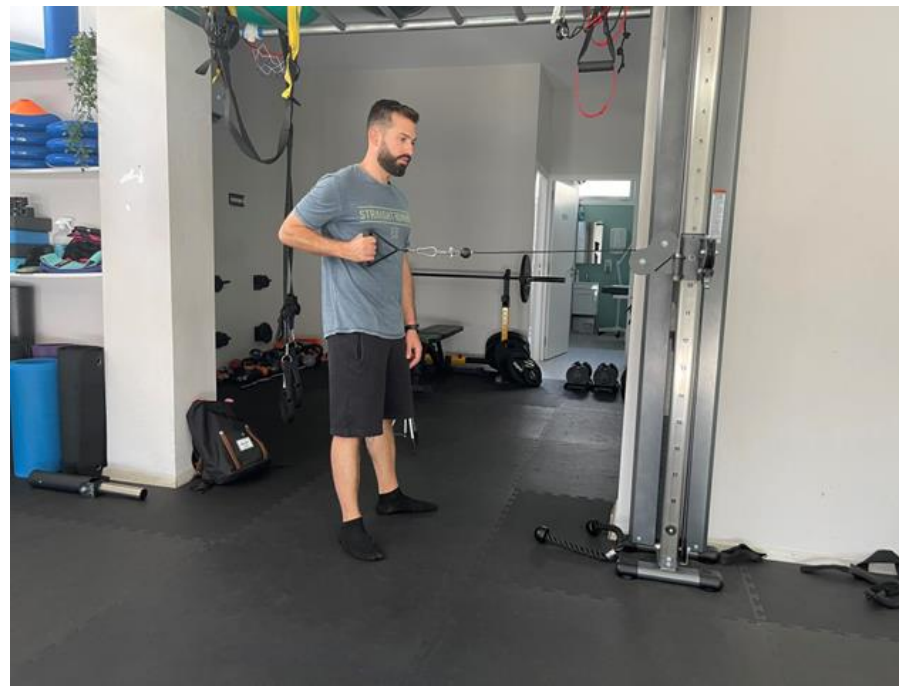

End position

## 2. Bear hug

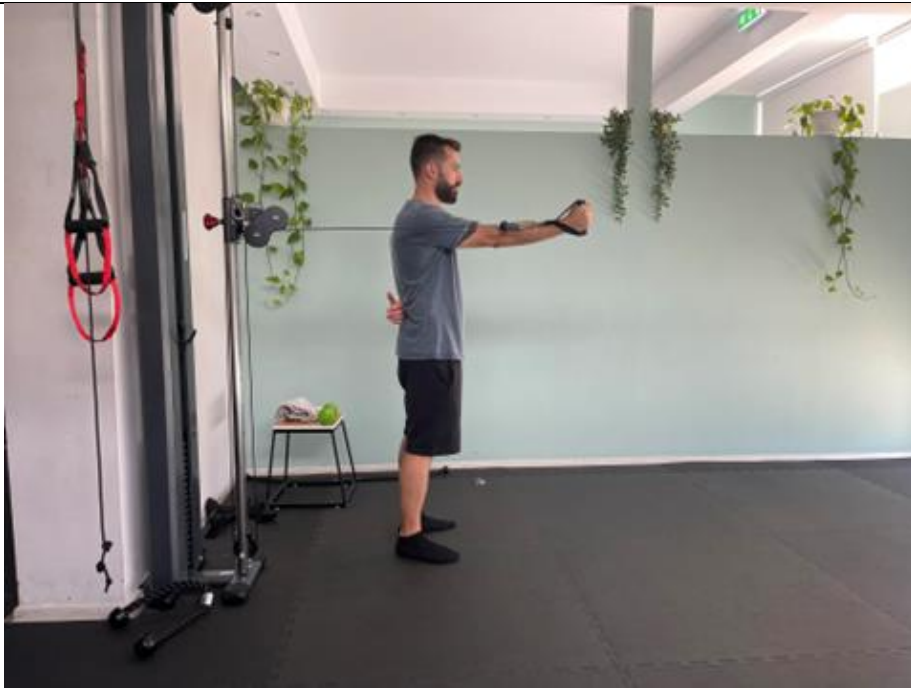

Start position

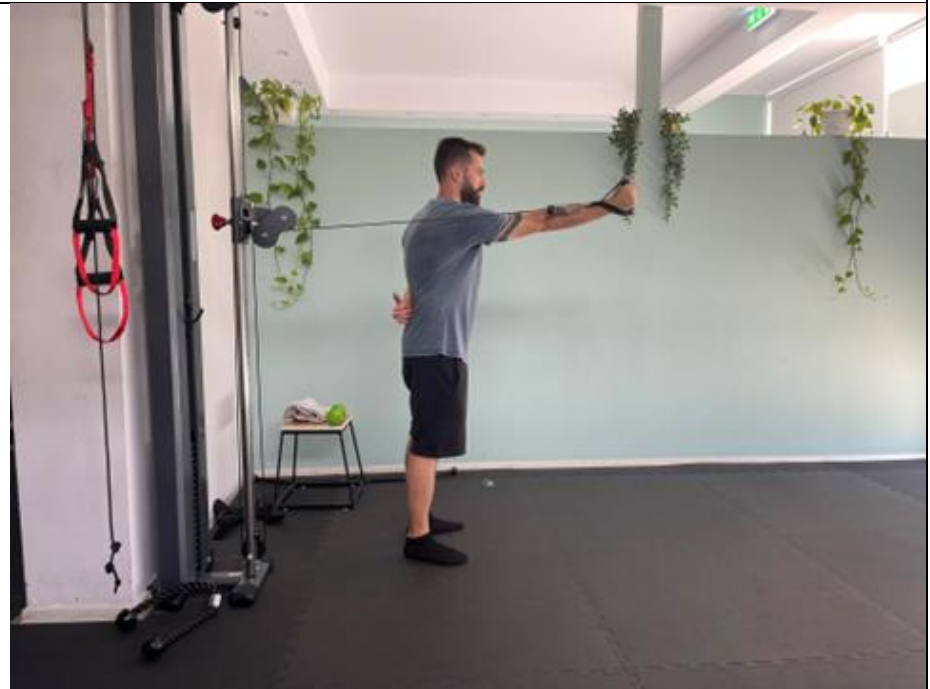

End position

### 3. Shoulder press

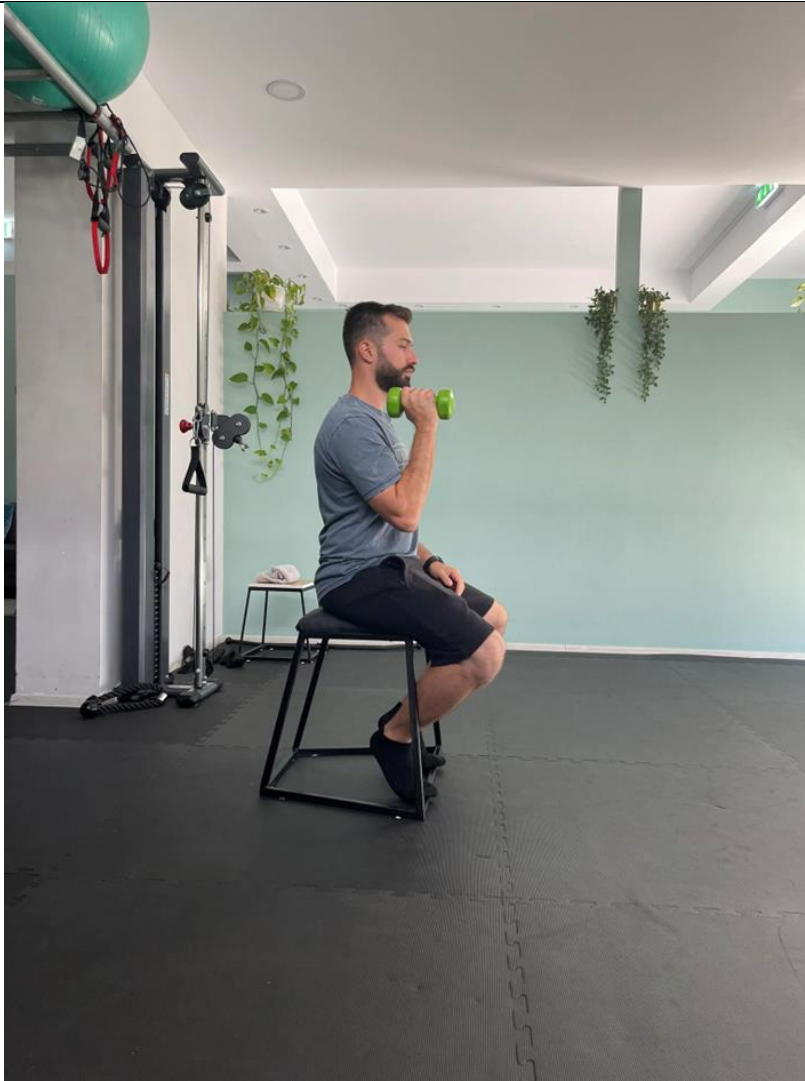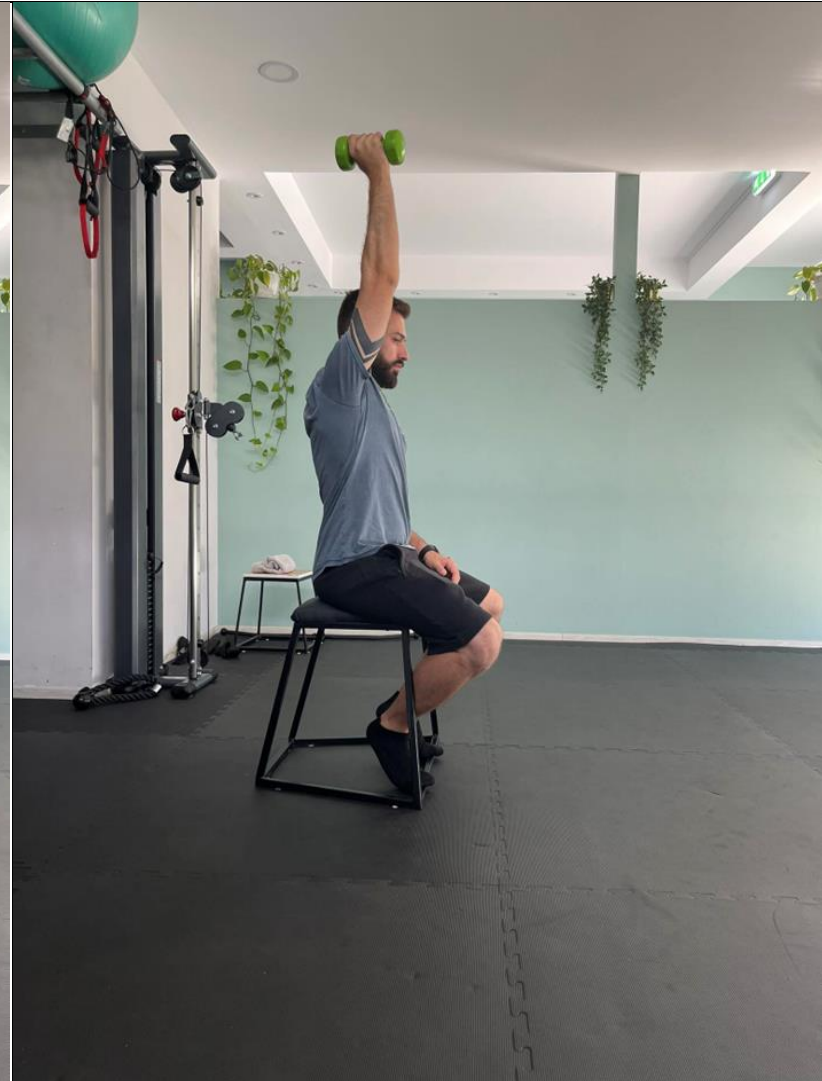

Start position

End position

4. Shoulder flexion

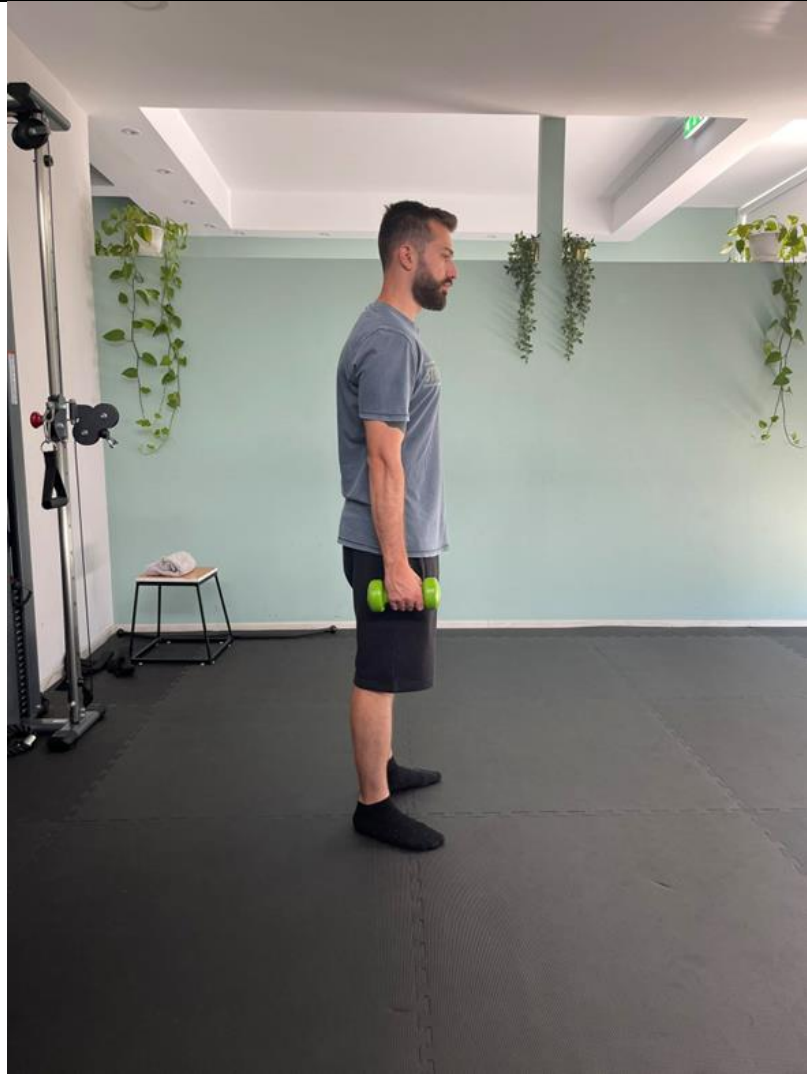

Start position

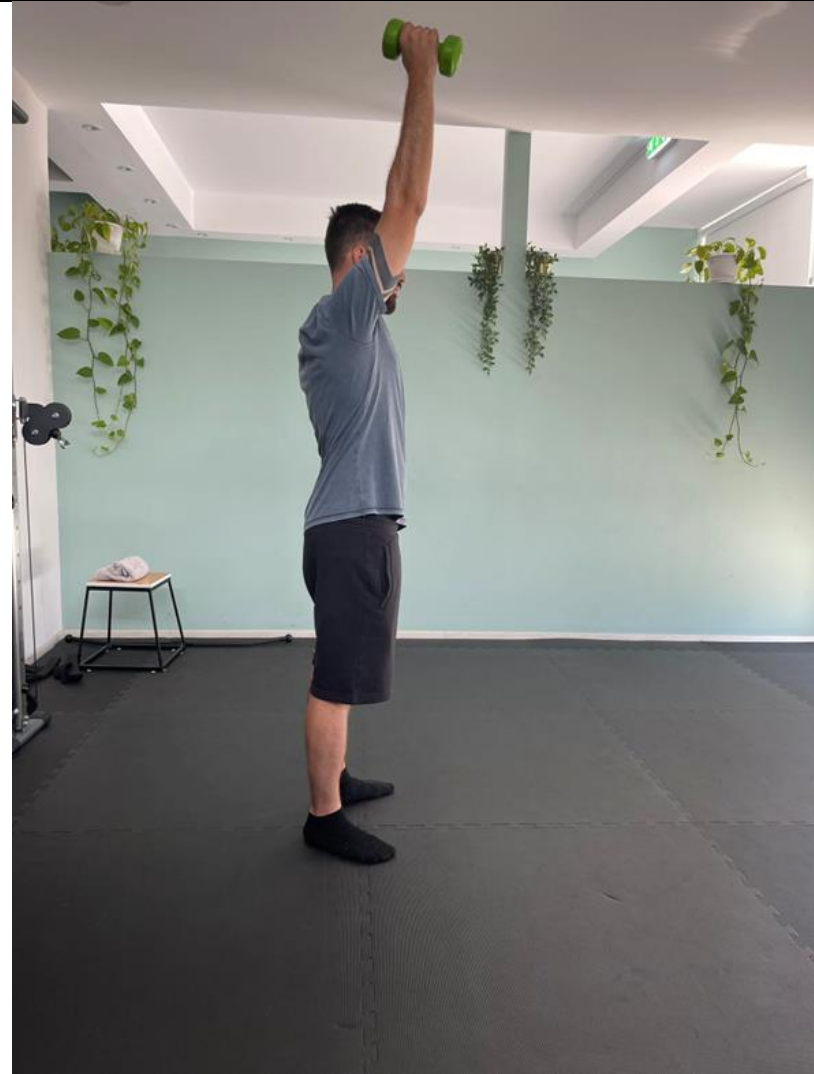

End position

5. Shoulder external rotation



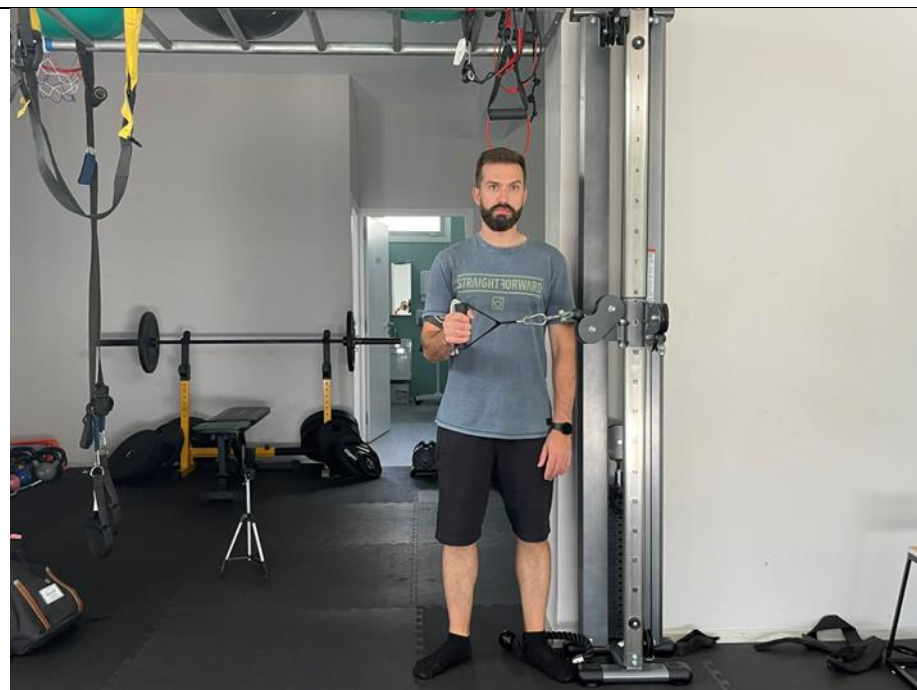

Start position

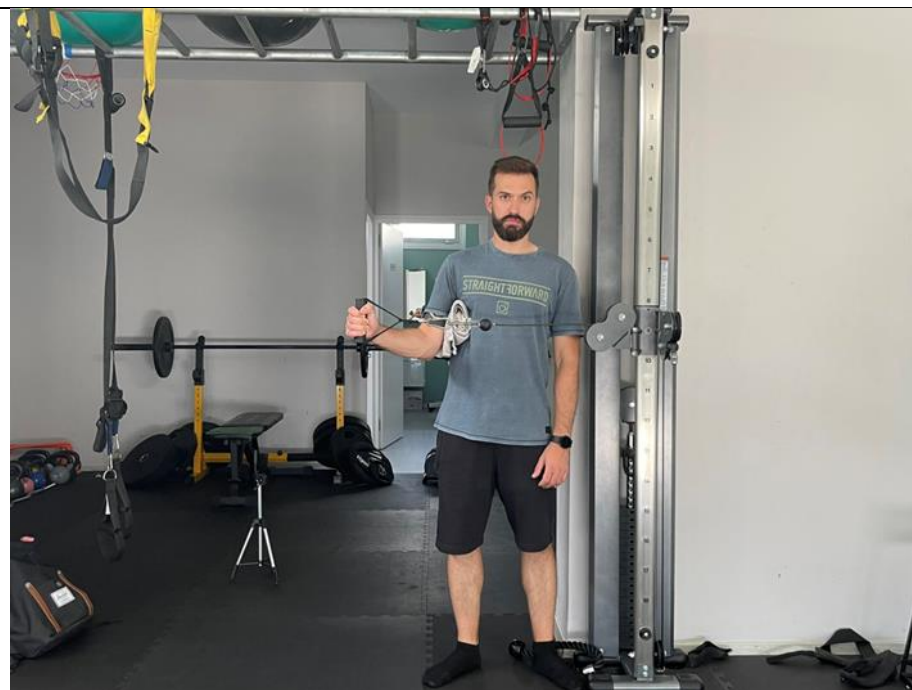

End position

6. Shoulder internal rotation

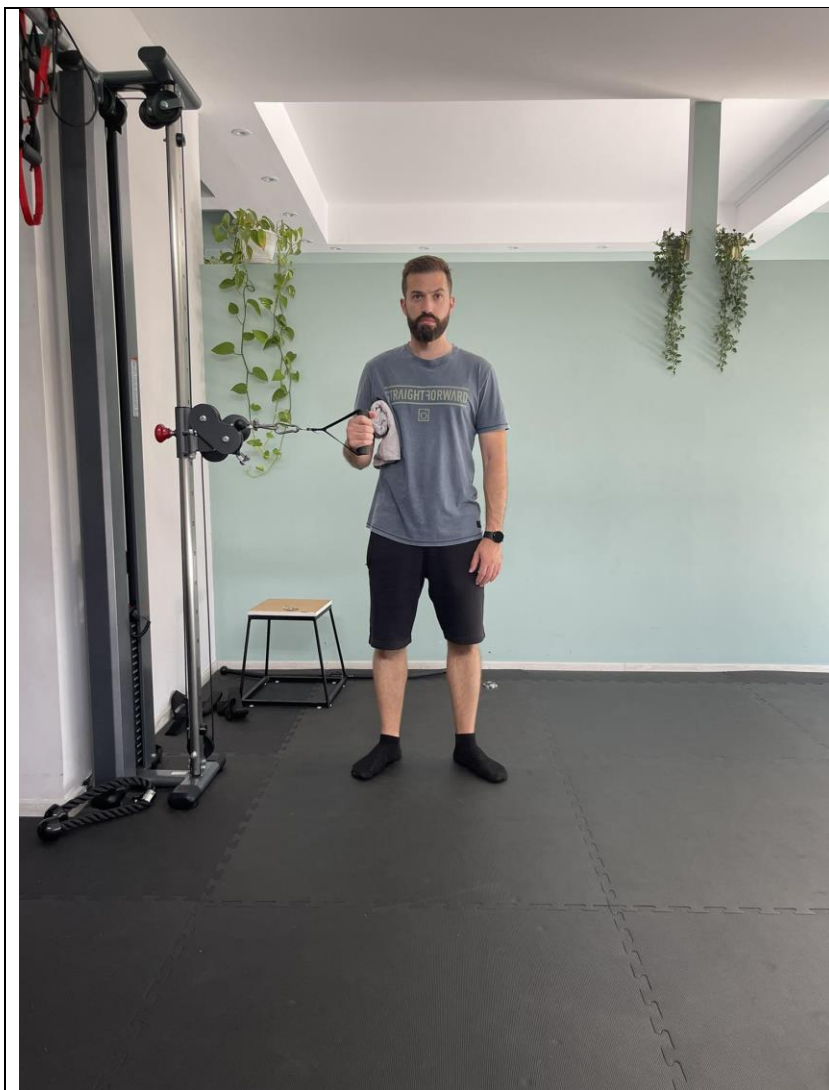

Start position

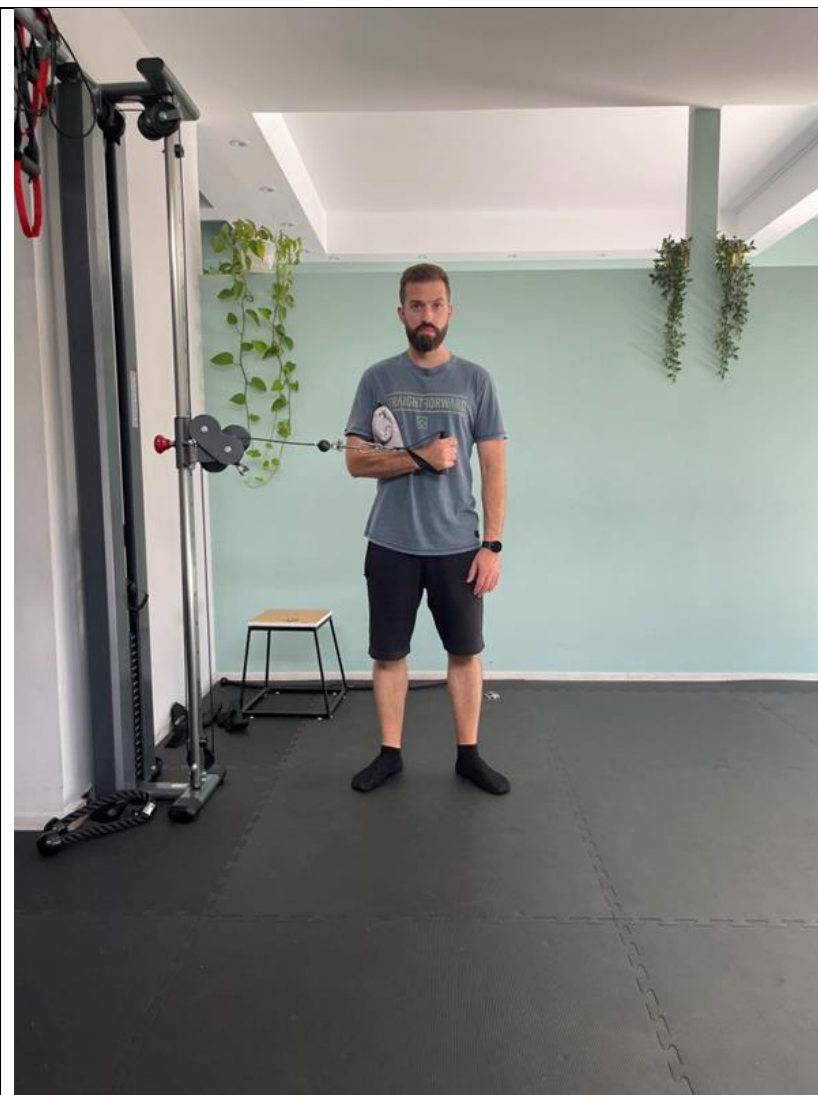

End position
